# Supplementary material
Source: Springer Nature journal article supplement (https://www.springermedizin.de/resource/supplementary/12986_2004_19_MOESM1_ESM.pdf/25655252)

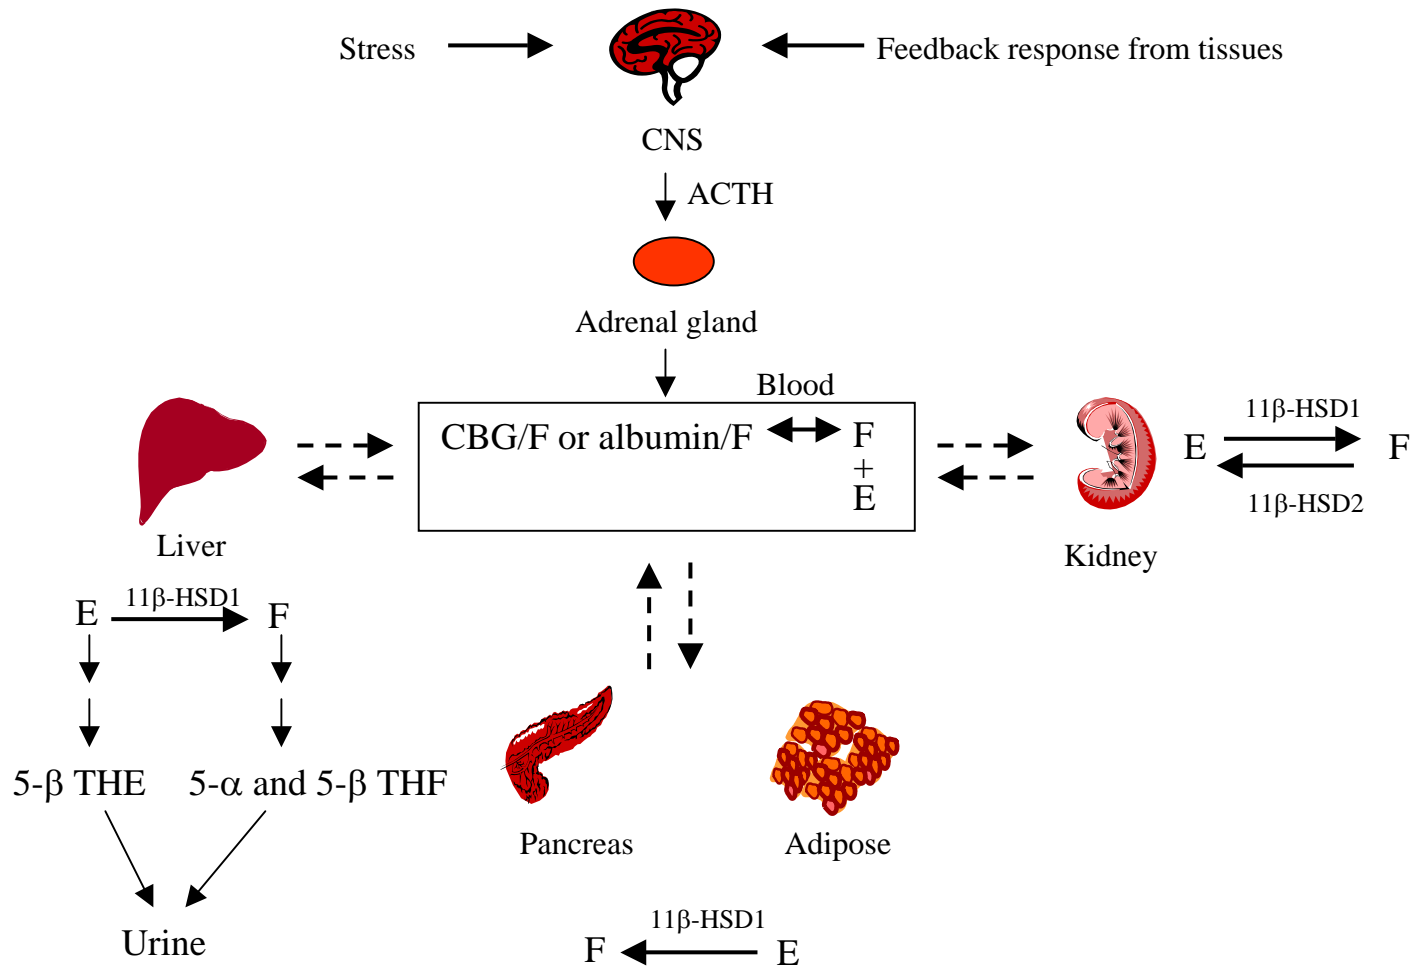

Fig. 1

Supplement: MOESM1 [file 25655252]
